# Supplementary material for: Three New Triterpene Esters from Pumpkin (Cucurbita maxima) Seeds
Source: Molecules. 2014 Apr 16;19(4):4802–13. doi: 10.3390/molecules19044802 (PMC6271469; doi:10.3390/molecules19044802)
Supplement: Supplementary file 1 [file molecules-19-04802-s001.pdf]

## Supporting Information

**Figure S1.**  $^1\text{H}$ -NMR spectrum of compound **1**.

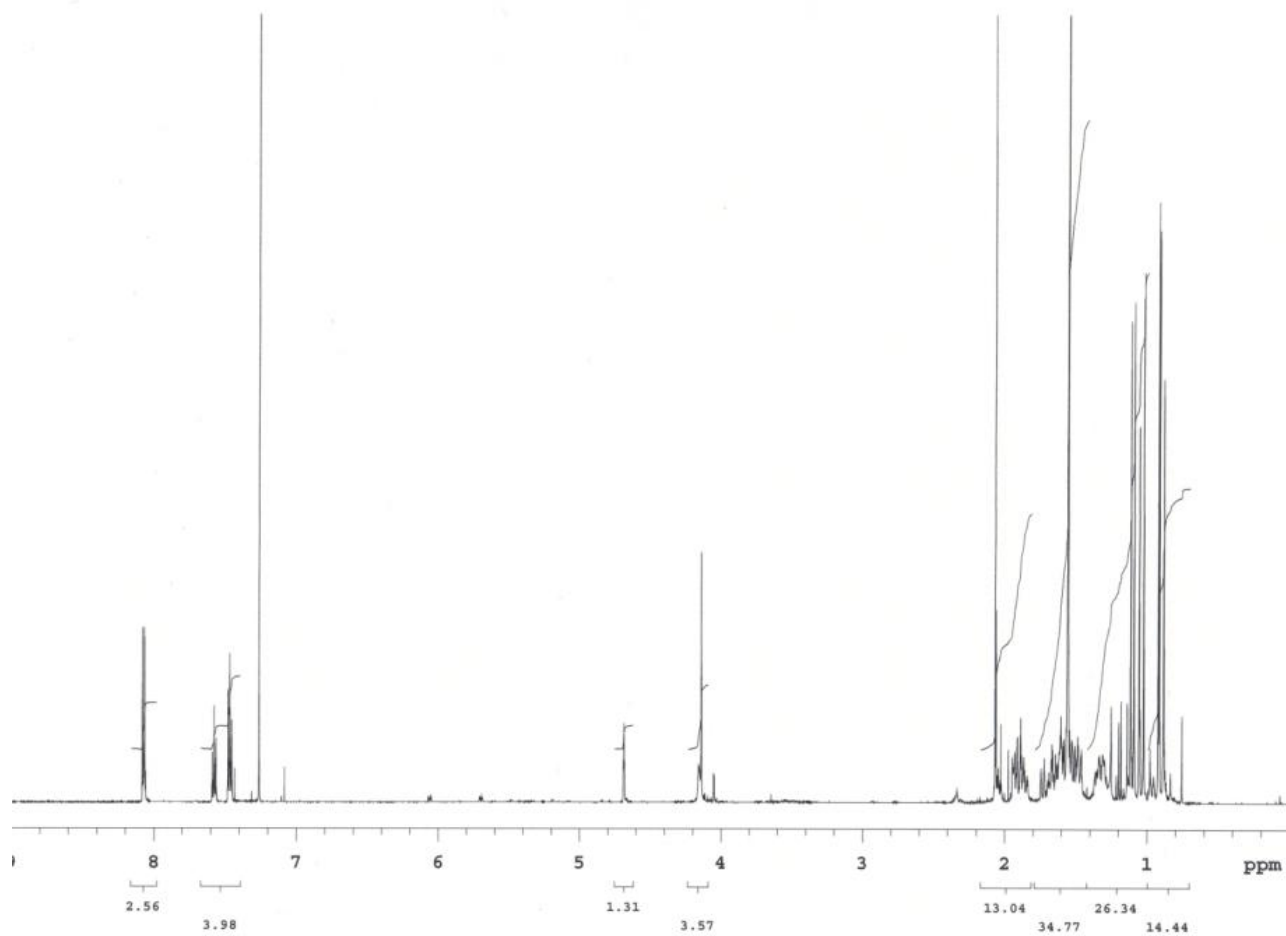

**Figure S2.**  $^{13}\text{C}$ -NMR spectrum of compound **1**.

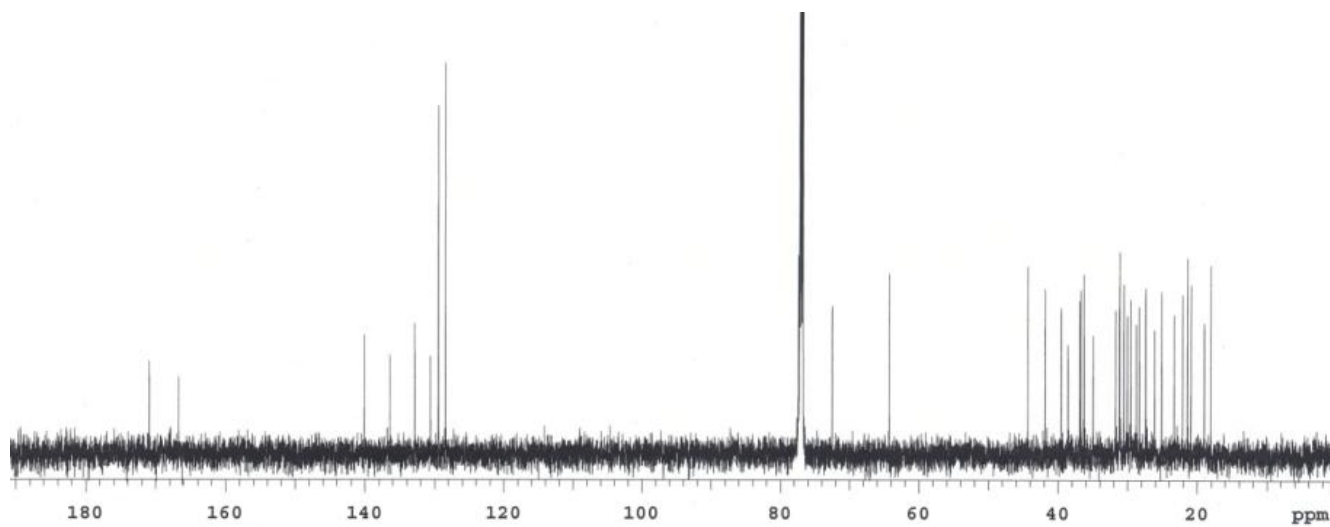

**Figure S3.** HSQC spectrum of compound **1**.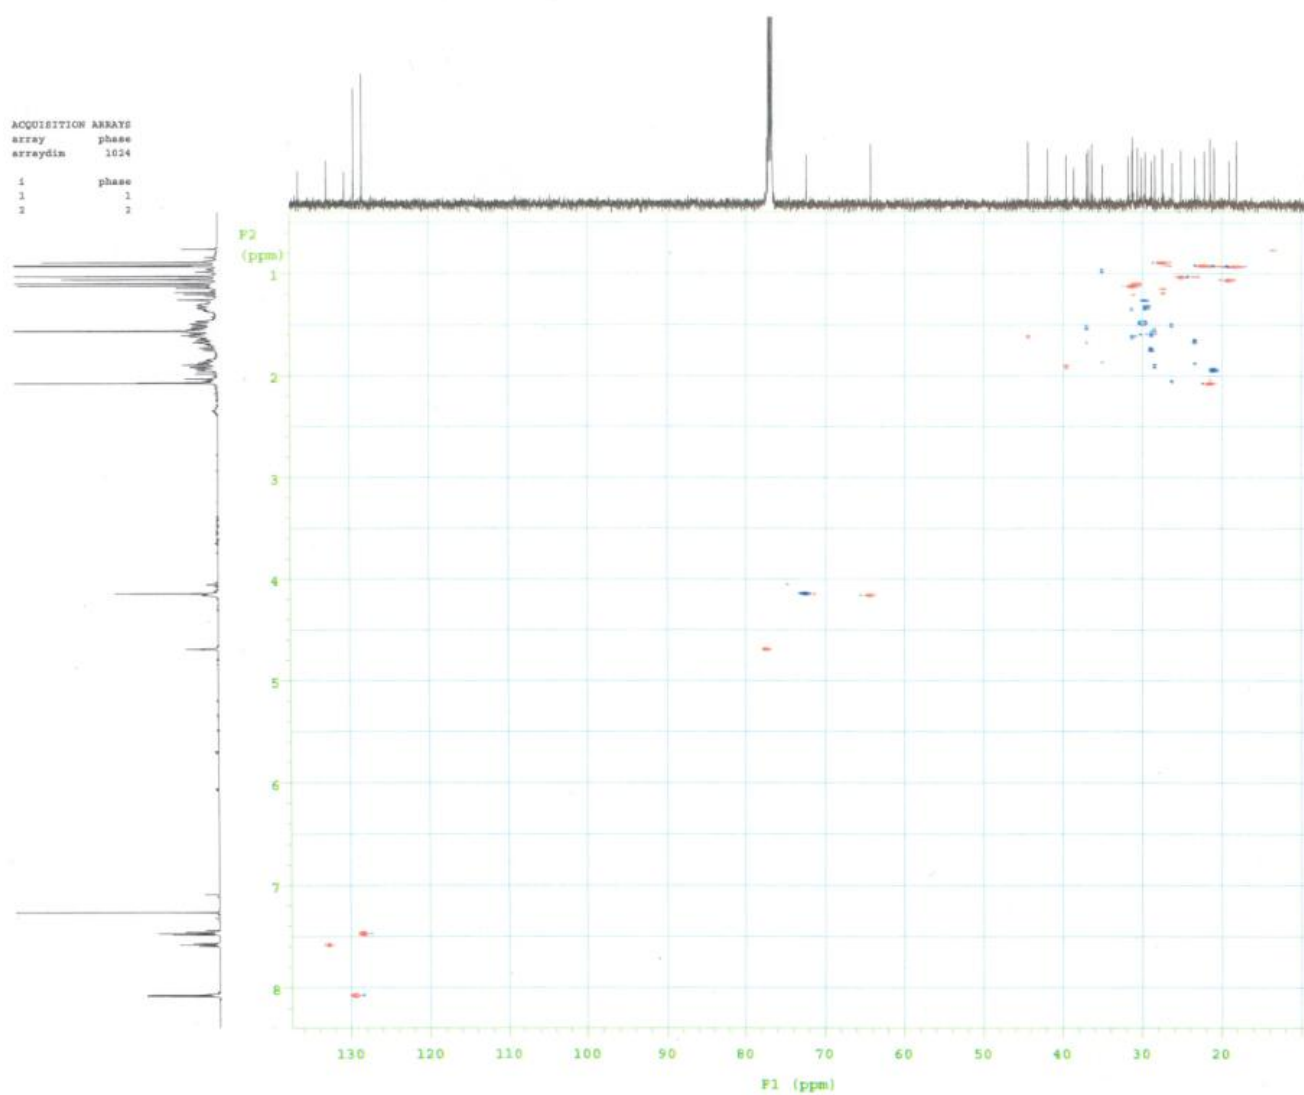

**Figure S4.** HMBC spectrum of compound **1**.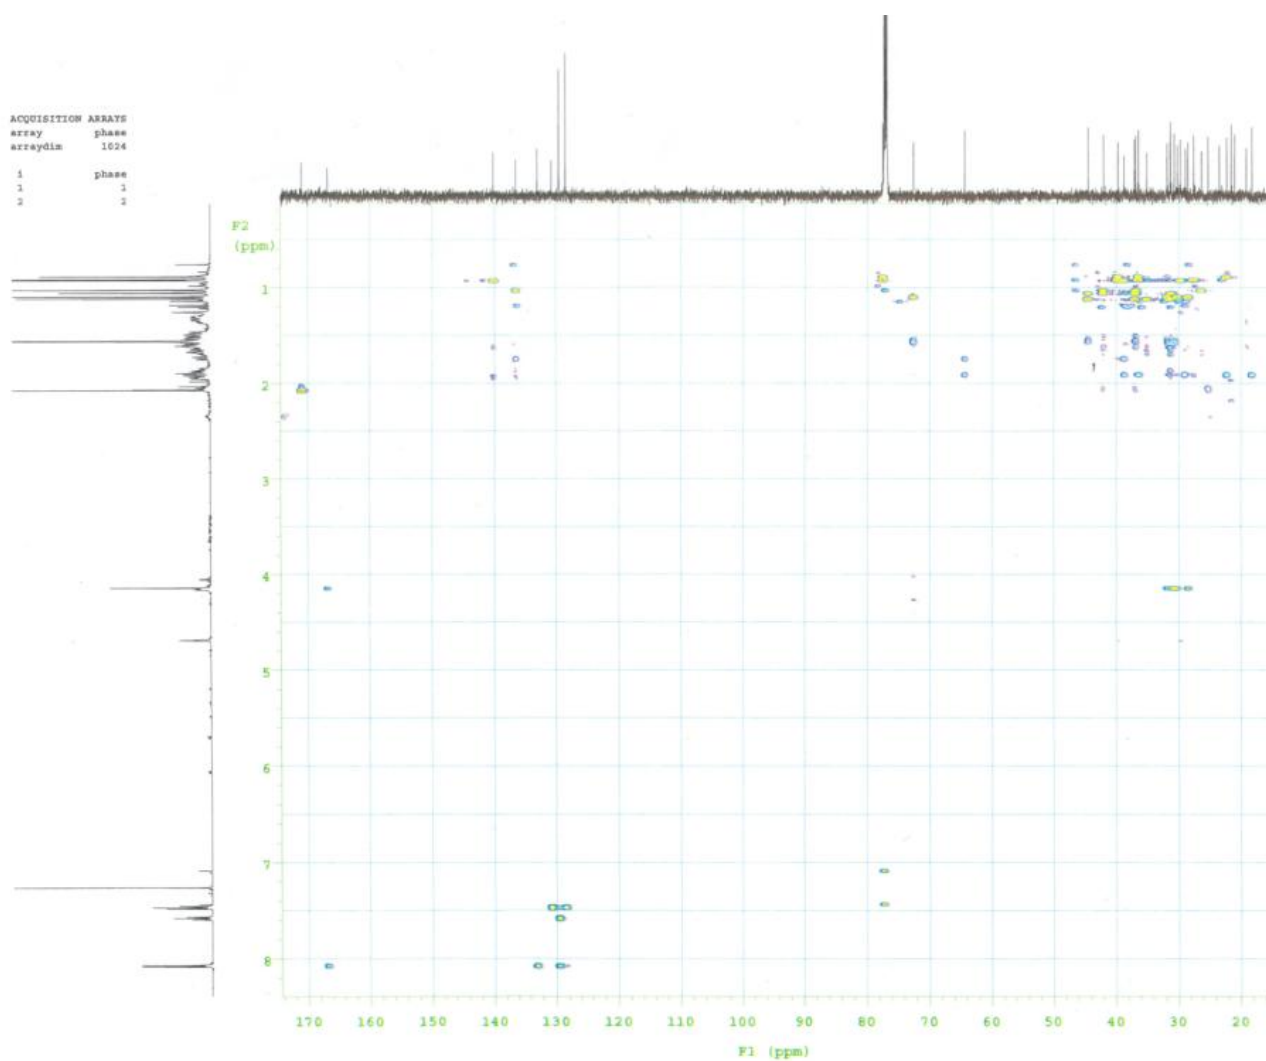

**Figure S5.**  $^1\text{H}$ - $^1\text{H}$  COSY spectrum of compound 1.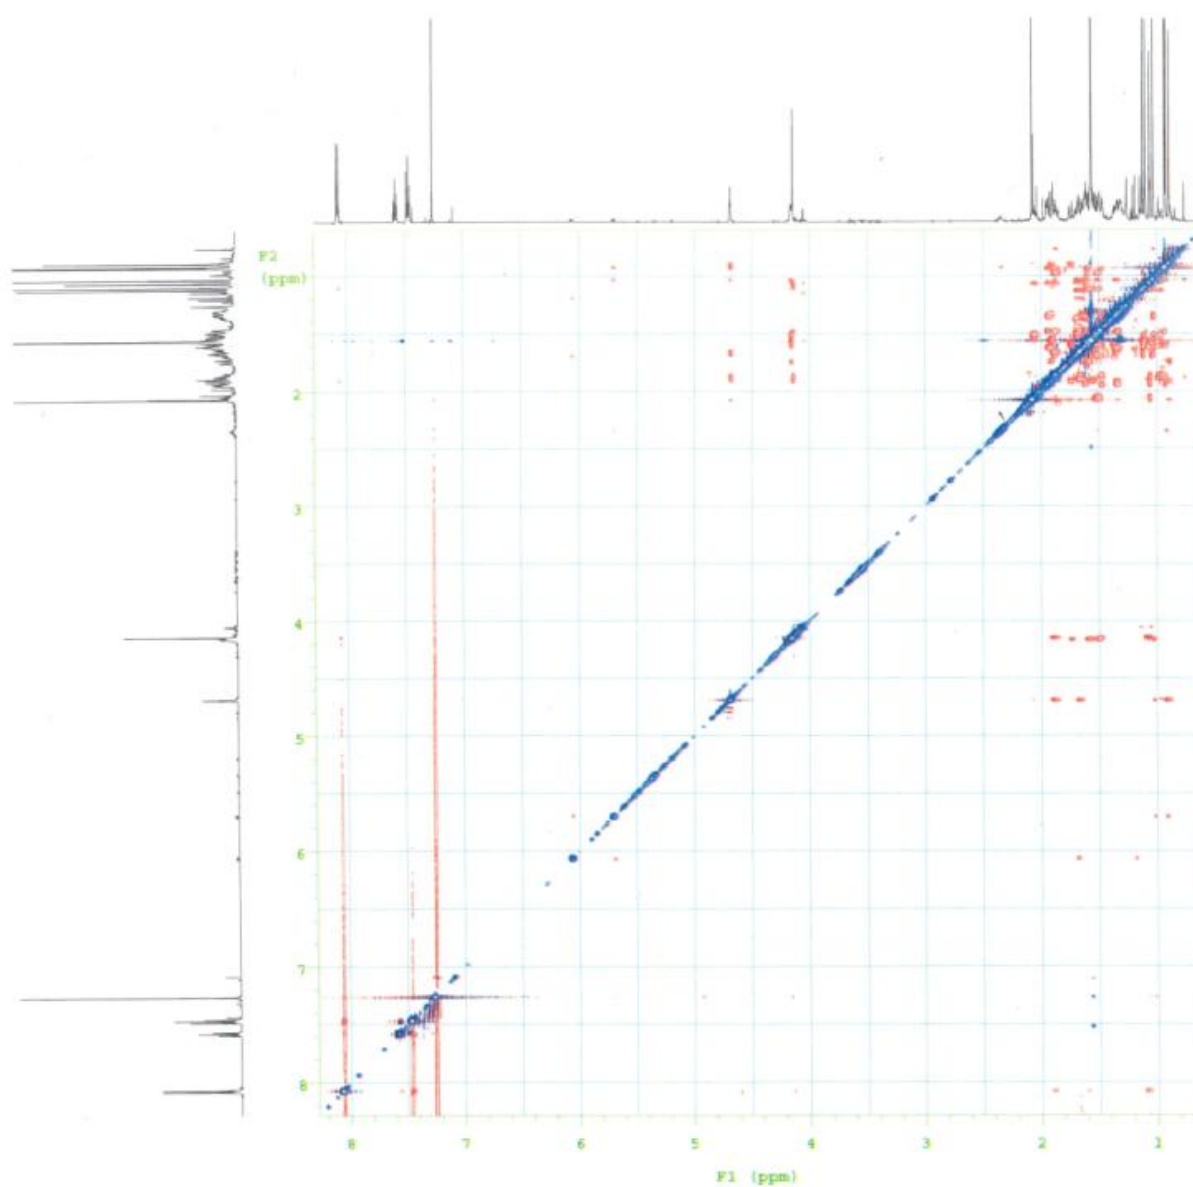

**Figure S6.** NOESY spectrum of compound 1.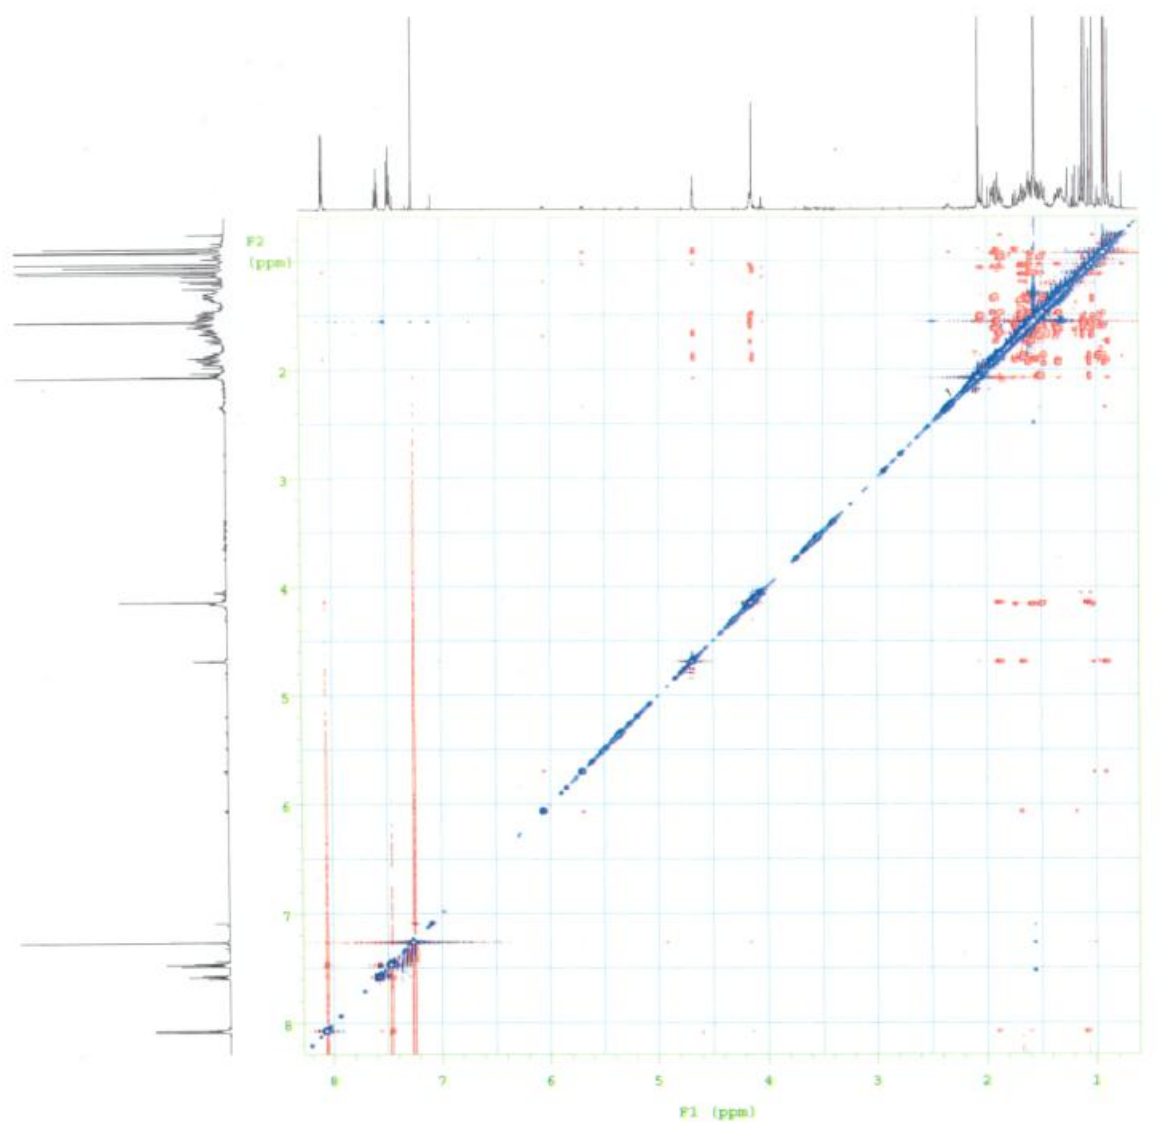

Figure S7. EI-MS of compound 1.

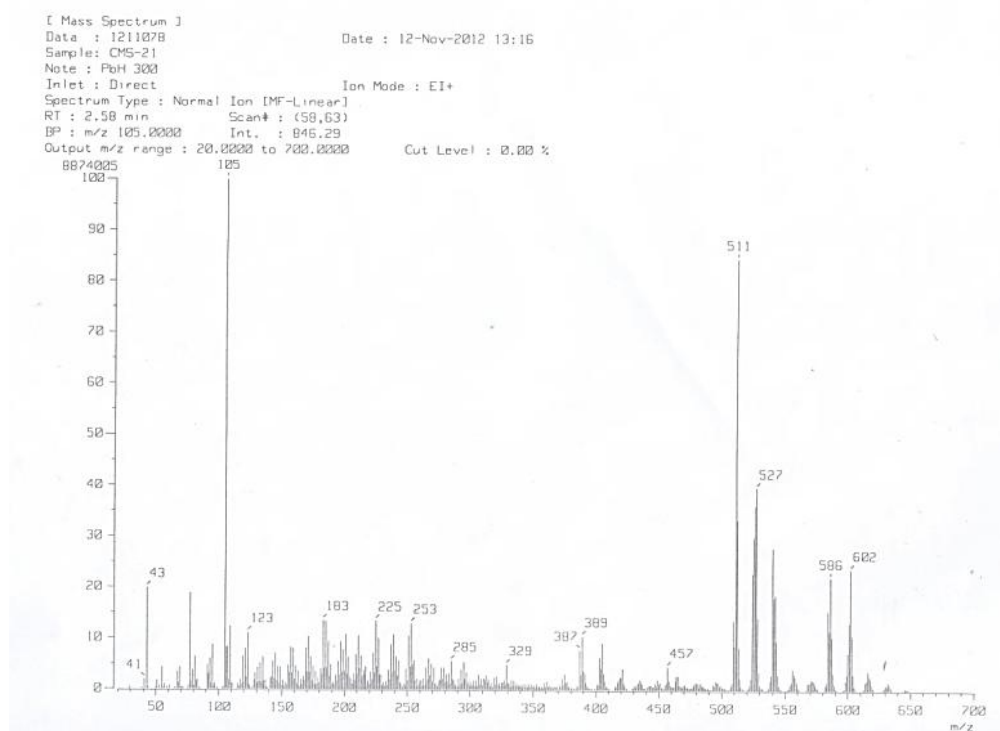Table S1.  $^1\text{H}$  (600 MHz) and  $^{13}\text{C}$  (150 MHz),  $^1\text{H}$ - $^1\text{H}$  COSY, NOESY, and HMBC NMR Spectroscopic Data of Compounds 1

| position         | $\delta_{\text{H}}$ (J in Hz) | $^1\text{H}$ - $^1\text{H}$ COSY          | NOE                                | $\delta_{\text{C}}$ , type | HMBC (H to C)                                       |
|------------------|-------------------------------|-------------------------------------------|------------------------------------|----------------------------|-----------------------------------------------------|
| 1                | $\alpha$ 1.33, m              | 1 $\beta$ 2 $\alpha$ 2 $\beta$            | 5 $\alpha$                         | 29.6, t                    | 25                                                  |
|                  | $\beta$ 1.47, m               | 1 $\alpha$ 2 $\alpha$ 2 $\beta$           |                                    |                            |                                                     |
| 2                | $\alpha$ 1.66, m              | 1 $\alpha$ 1 $\beta$ 2 $\beta$ 3 $\beta$  |                                    | 23.3, t                    |                                                     |
|                  | $\beta$ 1.88, m               | 1 $\alpha$ 1 $\beta$ 2 $\alpha$ 3 $\beta$ | 24 25                              |                            |                                                     |
| 3                | 4.69, t (3.0)                 | 2 $\alpha$ 2 $\beta$                      |                                    | 77.4, d                    | 23 24                                               |
| 4                |                               |                                           |                                    | 36.3, s                    | 5 $\alpha$ 23 24                                    |
| 5                | 1.91, m                       | 6 $\alpha$ 6 $\beta$                      | 1 $\alpha$                         | 39.6, d                    | 23 24 25                                            |
| 6                | $\alpha$ 1.74, m              | 5 $\alpha$ 6 $\beta$ 7 $\beta$            | 23                                 | 28.8, t                    | 5 $\alpha$                                          |
|                  | $\beta$ 1.60, m               | 5 $\alpha$ 6 $\alpha$ 7 $\beta$           | 24 25 26                           |                            |                                                     |
| 7                | 4.16, brs                     | 6 $\alpha$ 6 $\beta$                      | 15 $\alpha$ 26                     | 64.3, d                    | 5 $\alpha$ 6 $\alpha$                               |
| 8                |                               |                                           |                                    | 136.4, s                   | 6 $\alpha$ 11 26                                    |
| 9                |                               |                                           |                                    | 140.1, s                   | 11 12 $\beta$ 25                                    |
| 10               |                               |                                           |                                    | 38.6, s                    | 5 $\alpha$ 6 $\alpha$ 25                            |
| 11               | 1.93, 2H, m                   | 12 $\alpha$ 12 $\beta$                    |                                    | 20.9, t                    |                                                     |
| 12               | $\alpha$ 1.34, m              | 11 12 $\beta$                             |                                    | 31.19, t                   | 27                                                  |
|                  | $\beta$ 1.61, m               | 11 12 $\alpha$                            | 26                                 |                            |                                                     |
| 13               |                               |                                           |                                    | 36.8, s                    | 12 $\beta$ 19 $\beta$ 26 27                         |
| 14               |                               |                                           |                                    | 41.9, s                    | 12 $\beta$ 15 $\alpha$ 15 $\beta$ 26 27             |
| 15               | $\alpha$ 2.05, m              | 15 $\beta$ 16 $\alpha$ 16 $\beta$         |                                    | 26.1, t                    | 16 $\beta$ 26                                       |
|                  | $\beta$ 1.50, m               | 16 $\alpha$ 16 $\beta$ 15 $\alpha$        | 7 $\beta$ 27                       |                            |                                                     |
| 16               | $\alpha$ 1.54, m              | 15 $\alpha$ 15 $\beta$ 16 $\beta$         |                                    | 36.9, t                    | 15 $\alpha$ 28                                      |
|                  | $\beta$ 1.67, m               | 15 $\alpha$ 15 $\beta$ 16 $\alpha$        | 26                                 |                            |                                                     |
| 17               |                               |                                           |                                    | 31.2, s                    | 16 $\beta$ 18 19 $\alpha$ 19 $\beta$ 22 $\alpha$ 28 |
| 18               | 1.61, m                       | 19 $\alpha$ 19 $\beta$                    |                                    | 44.4, d                    | 16 $\alpha$ 27 28                                   |
| 19               | $\alpha$ 1.90, m              | 18 $\beta$ 19 $\beta$                     |                                    | 28.4, t                    | 29 30                                               |
|                  | $\beta$ 1.56, m               | 18 $\beta$ 19 $\alpha$                    | 28                                 |                            |                                                     |
| 20               |                               |                                           |                                    | 31.7, s                    | 19 $\beta$ 29 30                                    |
| 21               | $\alpha$ 1.47, m              | 21 $\beta$ 22 $\alpha$ 22 $\beta$         |                                    | 30.1, t                    | 29 30                                               |
|                  | $\beta$ 1.59, m               | 21 $\alpha$ 22 $\alpha$ 22 $\beta$        | 28                                 |                            |                                                     |
| 22               | $\alpha$ 1.87, m              | 22 $\beta$ 21 $\alpha$ 21 $\beta$         | 27 29                              | 35.0, t                    | 18 21 $\beta$ 28                                    |
|                  | $\beta$ 0.97, m               | 22 $\alpha$ 21 $\alpha$ 21 $\beta$        |                                    |                            |                                                     |
| 23               | 0.89, s                       |                                           | 6 $\alpha$                         | 27.4, q                    | 5 24                                                |
| 24               | 0.91, s                       |                                           | 2 $\beta$ 6 $\beta$                | 22.1, q                    | 5 23                                                |
| 25               | 0.92, s                       |                                           | 2 $\beta$ 6 $\beta$                | 18.1, q                    | 5                                                   |
| 26               | 1.03, s                       |                                           | 7 $\beta$ 12 $\beta$ 16 $\beta$ 18 | 25.1, q                    | 15 $\alpha$                                         |
| 27               | 1.06, s                       |                                           | 15 $\alpha$ 22 $\alpha$ 29         | 19.0, q                    | 12 $\alpha$ 12 $\beta$                              |
| 28               | 1.12, s                       |                                           | 19 $\beta$ 21 $\beta$              | 31.17, q                   |                                                     |
| 29               | 4.14, 2H, brs                 |                                           | 27 22 $\alpha$                     | 72.5, t                    | 19 $\beta$ 30                                       |
| 30               | 1.10, s                       |                                           |                                    | 30.6, q                    | 19 $\beta$ 29                                       |
| 3-O $\text{CO}$  |                               |                                           |                                    | 170.9, s                   | 3 1'                                                |
| 1'               | 2.07, s                       |                                           |                                    | 21.4, q                    |                                                     |
| 29-O $\text{CO}$ |                               |                                           |                                    | 166.7, s                   | 29 2'',6''                                          |
| 1''              |                               |                                           |                                    | 130.6, s                   | 3'',5''                                             |
| 2'',6''          | 8.07, dd (1.2, 7.4)           | 3'',5''                                   |                                    | 129.4, d                   | 4'' 2'',6''                                         |
| 3'',5''          | 7.47, tt (1.2, 7.4)           | 2'',6'' 4''                               |                                    | 128.4, d                   | 3'',5''                                             |
| 4''              | 7.58, tt (1.2, 7.4)           | 3'',5''                                   |                                    | 132.9, d                   | 2'',6''                                             |

**Figure S8.**  $^1\text{H}$ -NMR spectrum of compound **2**.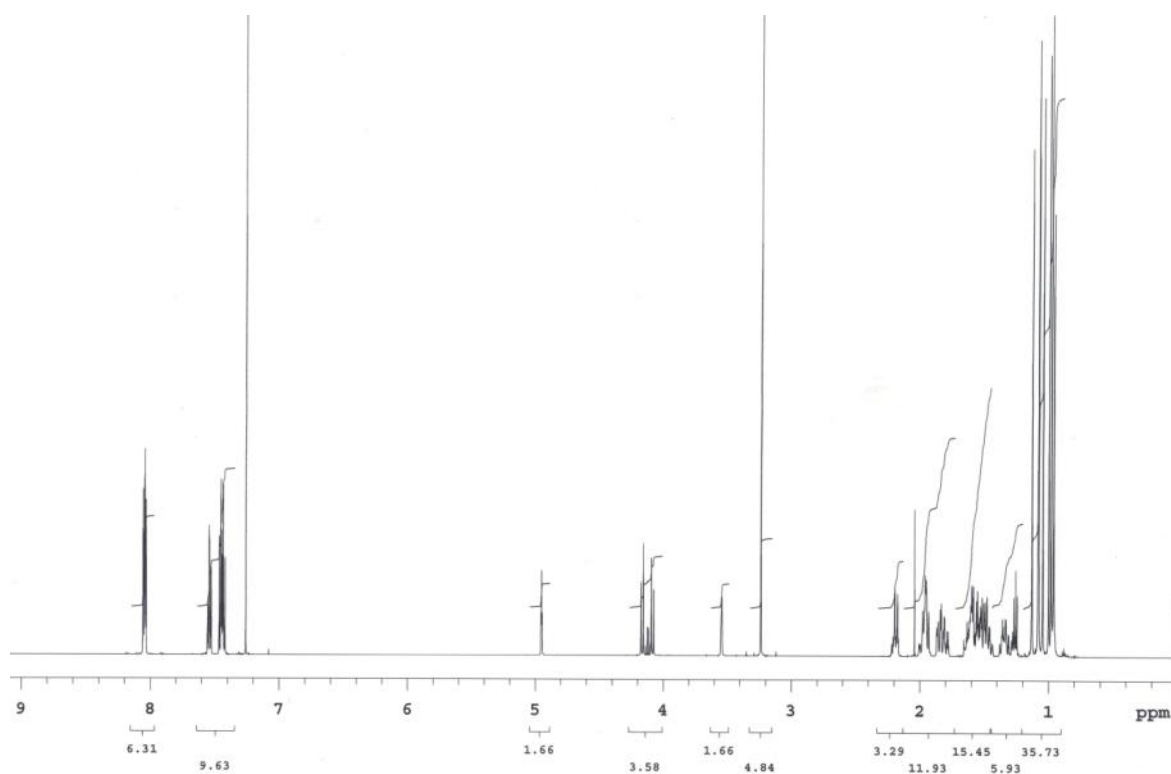**Figure S9.**  $^{13}\text{C}$ -NMR spectrum of compound **2**.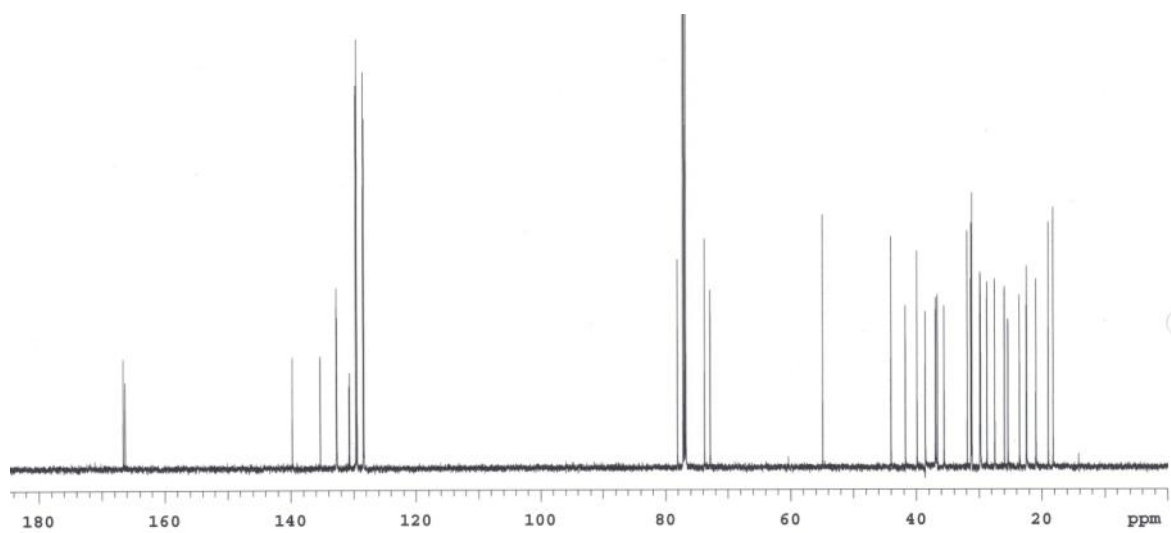

**Figure S10.** HSQC spectrum of compound 2.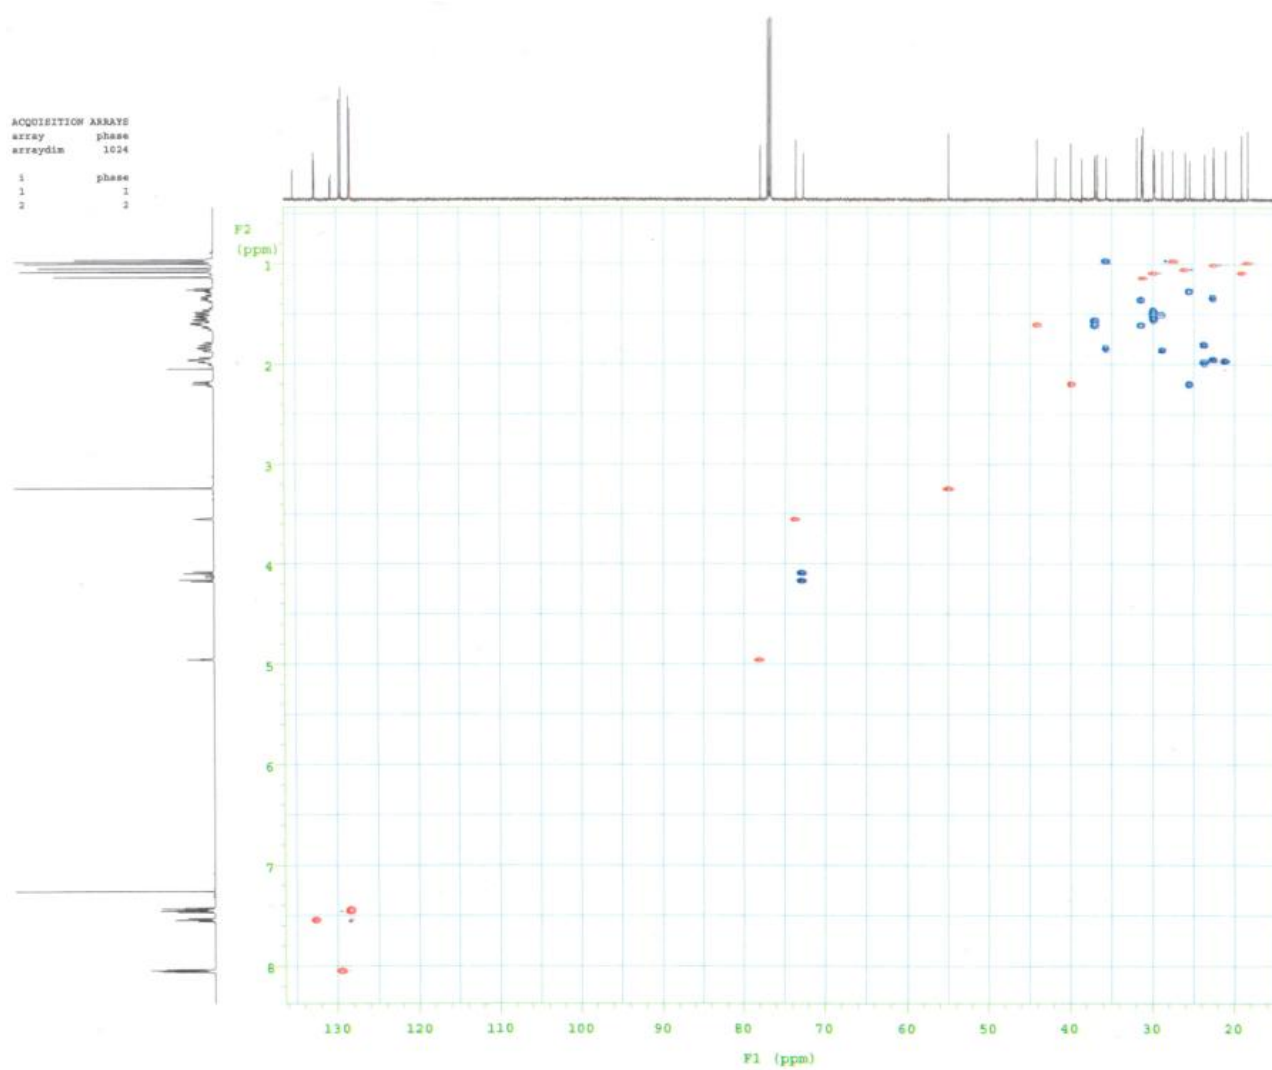

**Figure S11.** HMBC spectrum of compound 2.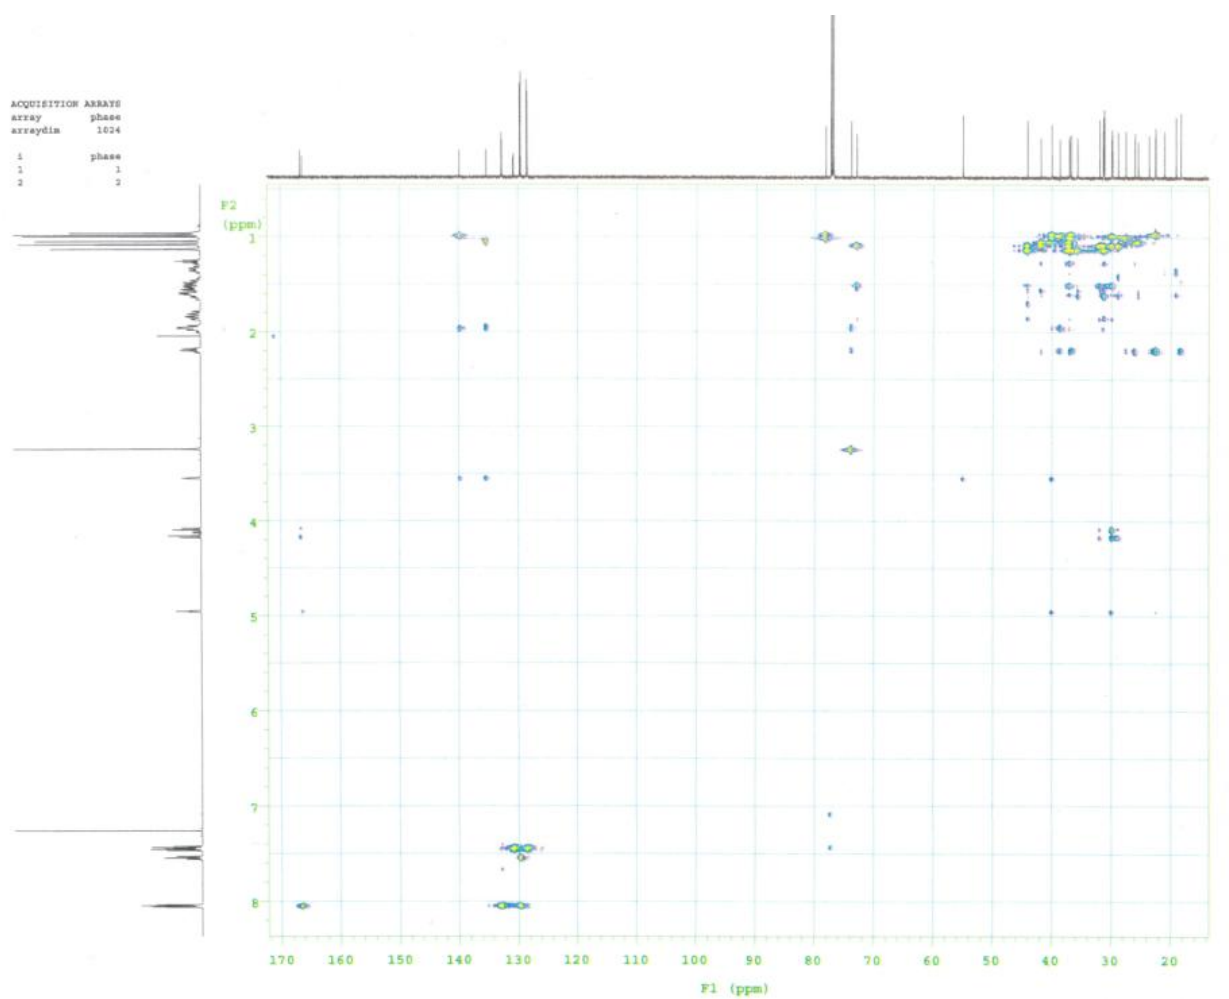

**Figure S12.**  $^1\text{H}$ - $^1\text{H}$  COSY spectrum of compound 2.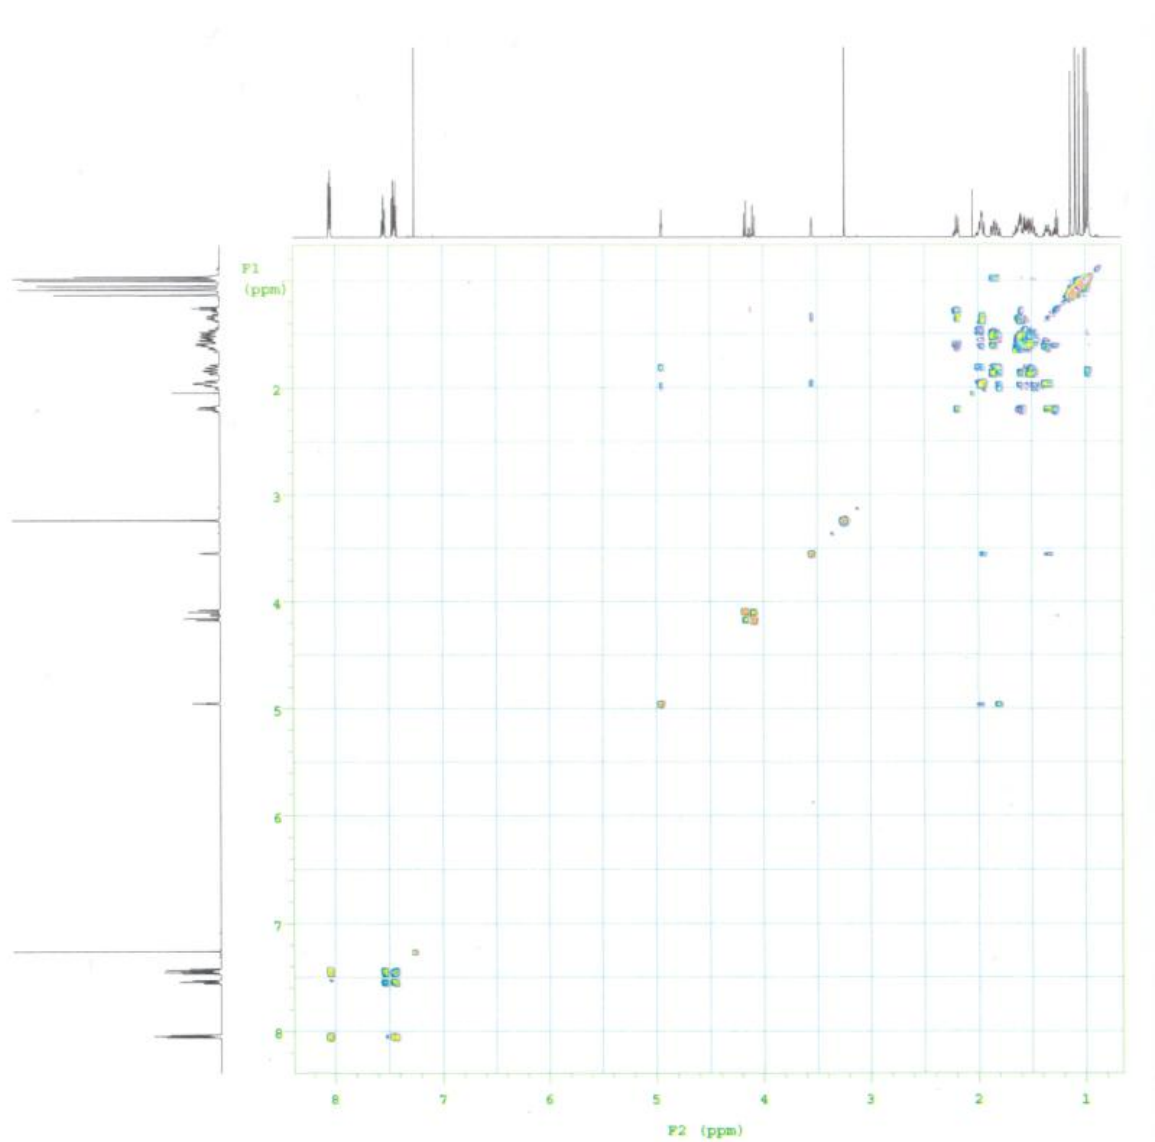

**Figure S13.** NOESY spectrum of compound 2.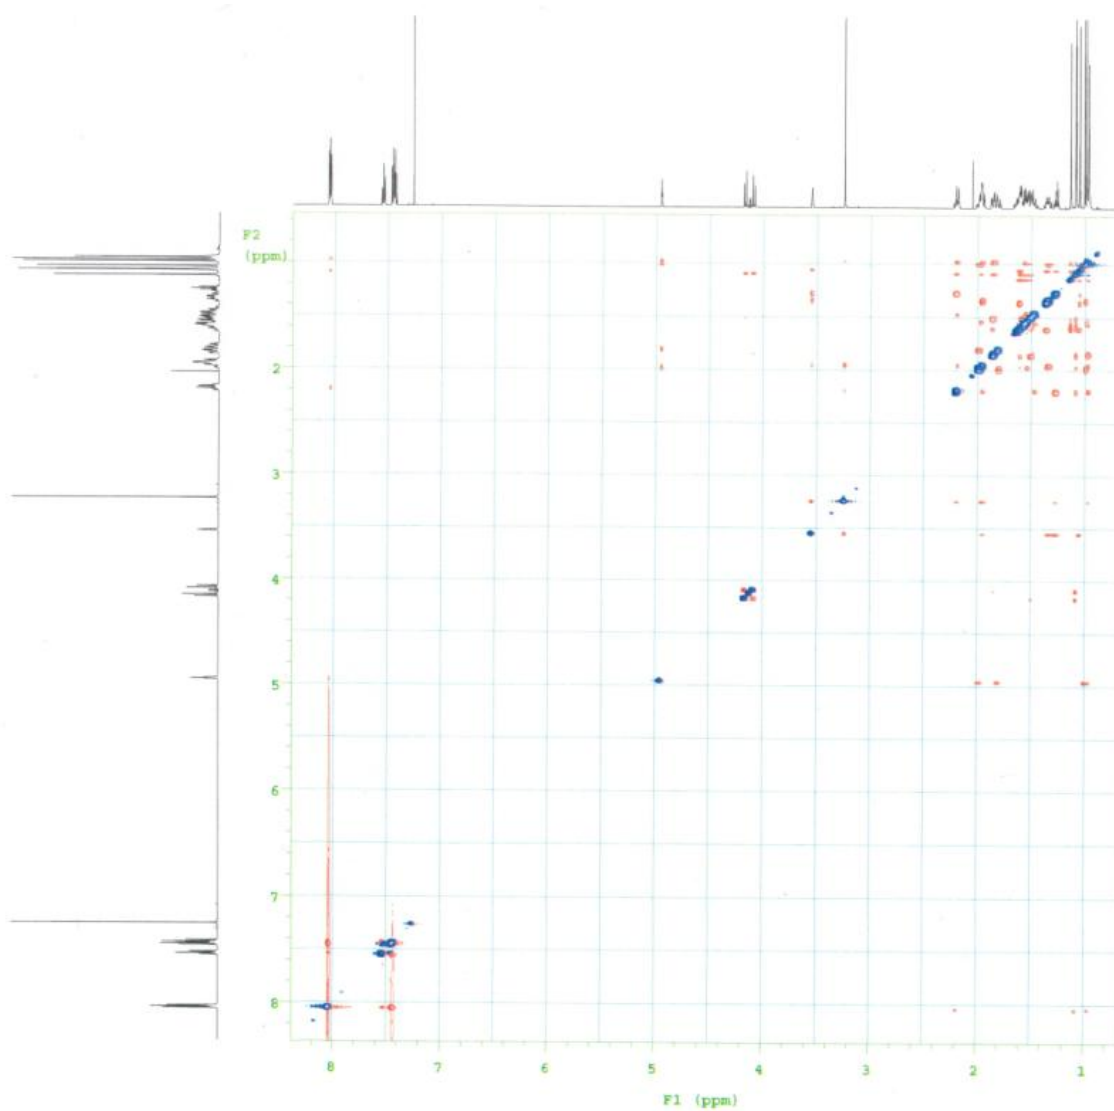

**Figure S14.** EI-MS of compound 2.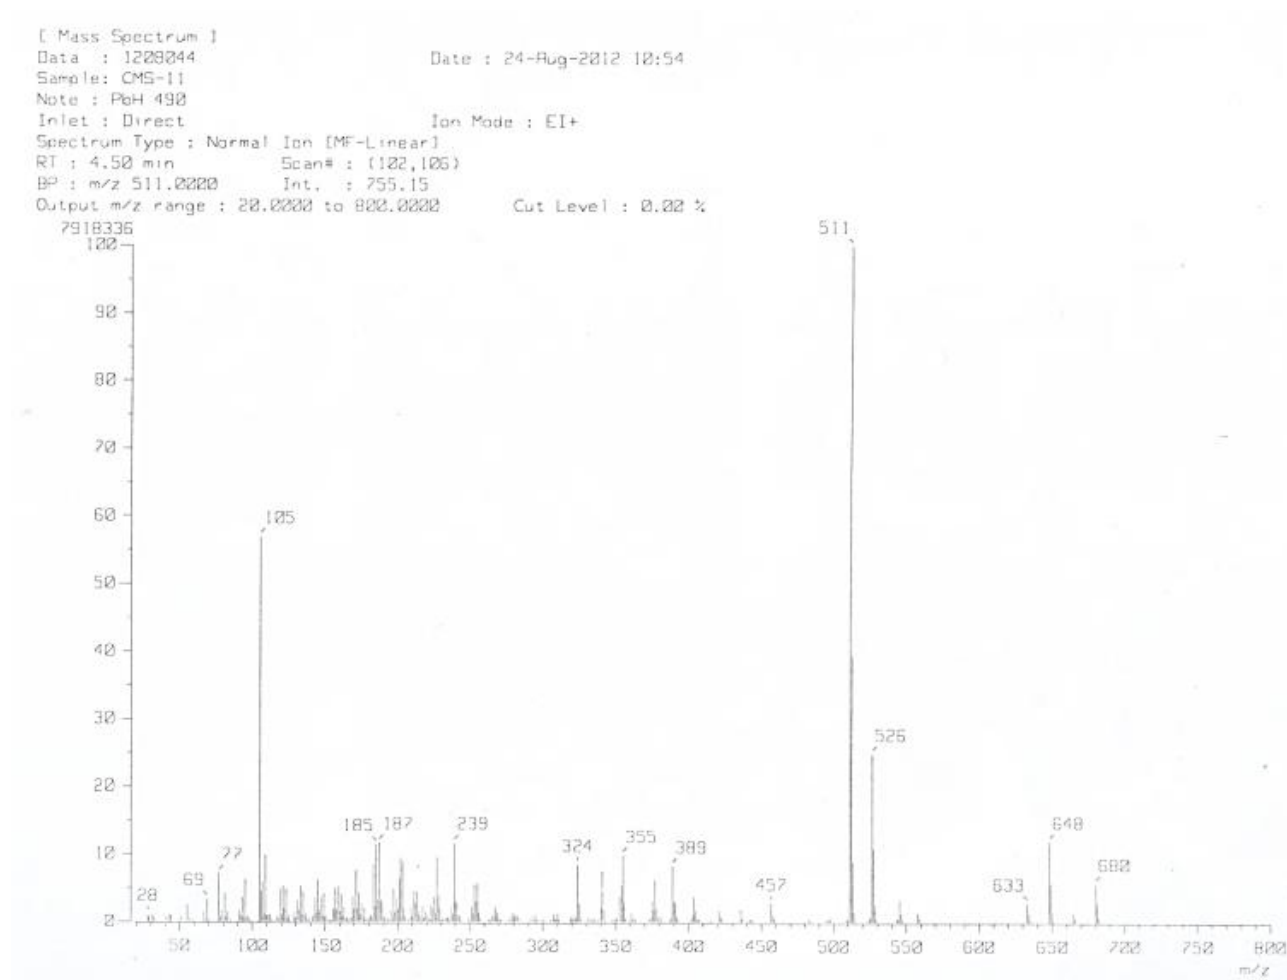

Table S2. <sup>1</sup>H (600 MHz) and <sup>13</sup>C (150 MHz), <sup>1</sup>H-<sup>1</sup>H COSY, NOESY, and HMBC NMR Spectroscopic Data of Compounds 2

| position               |   | δ <sub>H</sub> (J in Hz)          | <sup>1</sup> H- <sup>1</sup> H COSY |     |     | NOE   |     |       | δ <sub>C</sub> , type  | HMBC (H to C) |       |          |     |     |
|------------------------|---|-----------------------------------|-------------------------------------|-----|-----|-------|-----|-------|------------------------|---------------|-------|----------|-----|-----|
| 1                      | α | 1.48, m                           | 1β                                  | 2α  | 2β  | 5α    |     |       | 29.8, t                | 3β            | 25    |          |     |     |
|                        | β | 1.53, m                           | 1α                                  | 2α  | 2β  |       |     |       |                        |               |       |          |     |     |
| 2                      | α | 1.80, m                           | 1α                                  | 1β  | 3β  |       |     |       | 23.6, t                |               |       |          |     |     |
|                        | β | 1.98, m                           | 1α                                  | 1β  | 3β  | 24    | 25  |       |                        |               |       |          |     |     |
| 3                      |   | 4.95, t (2.9)                     | 2α                                  | 2β  |     |       |     |       | 78.1, d                | 23            | 24    |          |     |     |
| 4                      |   |                                   |                                     |     |     |       |     |       | 36.7, s                | 5α            | 23    | 24       |     |     |
| 5                      |   | 2.19, dd (1.2, 12.6)              | 6α                                  | 6β  |     | 1α    | 27  | 7-OMe | 39.9, d                | 3β            | 6α    | 7β       | 23  | 24  |
| 6                      | α | 1.95, m                           | 5α                                  | 6β  | 7β  | 23    |     |       | 22.5, t                | 5α            |       |          |     | 25  |
|                        | β | 1.34, m                           | 5α                                  | 6α  | 7β  | 24    |     |       |                        |               |       |          |     |     |
| 7                      |   | 3.54, brs                         | 6α                                  | 6β  |     | 15β   | 26  |       | 73.8, d                | 5α            | 6α    |          |     |     |
| 8                      |   |                                   |                                     |     |     |       |     |       | 135.3, s               | 6α            | 7β    | 26       |     |     |
| 9                      |   |                                   |                                     |     |     |       |     |       | 139.7, s               | 7β            | 11    | 25       |     |     |
| 10                     |   |                                   |                                     |     |     |       |     |       | 38.6, s                | 5α            | 6α    | 25       |     |     |
| 11                     |   | 1.97, m                           | 12α                                 | 12β |     |       |     |       | 20.9, t                | 12α           |       |          |     |     |
| 12                     | α | 1.35, m                           | 11                                  | 12β |     |       |     |       | 31.3, t                | 11            | 27    |          |     |     |
|                        | β | 1.61, m                           | 11                                  | 12α |     | 26    |     |       |                        |               |       |          |     |     |
| 13                     |   |                                   |                                     |     |     |       |     |       | 37.0, s                | 11            | 15β   | 18β      | 19α | 19β |
| 14                     |   |                                   |                                     |     |     |       |     |       | 41.8, s                | 15α           | 15β   | 16β      | 26  | 27  |
| 15                     | α | 2.19, m                           | 15β                                 | 16α | 16β | 7-OMe |     |       | 25.4, t                | 16α           | 26    |          |     |     |
|                        | β | 1.26, m                           | 15α                                 | 16α | 16β | 7β    |     |       |                        |               |       |          |     |     |
| 16                     | α | 1.56, m                           | 15α                                 | 15β | 16β |       |     |       | 36.9, t                | 15β           | 22β   | 28       |     |     |
|                        | β | 1.61, m                           | 15α                                 | 15β | 16α | 26    |     |       |                        |               |       |          |     |     |
| 17                     |   |                                   |                                     |     |     |       |     |       | 31.1, s                | 15β           | 16α   | 16β      | 18  | 21α |
| 18                     |   | 1.60, m                           | 19α                                 | 19β |     | 26    |     |       | 44.0, d                | 16β           | 21β   | 22α      | 27  | 28  |
| 19                     | α | 1.86, m                           | 18β                                 | 19β |     |       |     |       | 28.8, t                | 18β           | 29a   | 29b      | 30  |     |
|                        | β | 1.49, m                           | 18β                                 | 19α |     | 28    |     |       |                        |               |       |          |     |     |
| 20                     |   |                                   |                                     |     |     |       |     |       | 31.9, s                | 19β           | 22α   | 29a      | 29b | 30  |
| 21                     | α | 1.48, m                           | 21β                                 | 22α | 22β |       |     |       | 29.9, t                | 19β           | 22α   | 22β      | 29a | 29b |
|                        | β | 1.53, m                           | 21α                                 | 22α | 22β | 28    |     |       |                        |               |       |          |     |     |
| 22                     | α | 1.84, d (4.4)                     | 21α                                 | 21β | 22β | 27    |     |       | 35.6, t                | 16α           | 16β   | 18       | 28  |     |
|                        | β | 0.96, m                           | 21α                                 | 21β | 22α |       |     |       |                        |               |       |          |     |     |
| 23                     |   | 0.97, s                           |                                     |     |     | 6α    |     |       | 27.5, q                | 5             | 24    |          |     |     |
| 24                     |   | 1.00, s                           |                                     |     |     | 2β    | 6β  | 25    | 22.4, q                | 5             | 23    |          |     |     |
| 25                     |   | 0.98, s                           |                                     |     |     | 2β    | 24  |       | 18.2, q                | 5             |       |          |     |     |
| 26                     |   | 1.05, s                           |                                     |     |     | 7β    | 12β | 16β   | 26.0, q                | 15α           | 15β   |          |     |     |
| 27                     |   | 1.082, s                          |                                     |     |     | 5α    | 22α | 29a   | 19.0, q                | 12α           | 12β   | 18       |     |     |
| 28                     |   | 1.13, s                           |                                     |     |     | 19β   | 21β |       | 31.3, q                | 16α           | 16β   | 18       | 22α | 22β |
| 29                     | a | 4.16, d (10.8)                    |                                     |     |     | 27    |     |       | 72.9, t                | 19β           | 21α   | 21β      | 30  |     |
|                        | b | 4.08, d (10.8)                    |                                     |     |     | 27    |     |       |                        |               |       |          |     |     |
| 30                     |   | 1.084, s                          |                                     |     |     |       |     |       | 29.8, q                | 29a           | 29b   |          |     |     |
| 3-O <sup>13</sup> C=O  |   |                                   |                                     |     |     |       |     |       | 166.3, s               | 3             | 2',6' |          |     |     |
| 1'                     |   |                                   |                                     |     |     |       |     |       | 130.8 <sup>a</sup> , s | 3',5'         |       |          |     |     |
| 2'', 6''               |   | 8.05 <sup>a</sup> , dd (1.4, 7.4) | 3',5'                               |     |     |       |     |       | 129.6 <sup>b</sup> , d | 4'            | 2',6' |          |     |     |
| 3'', 5''               |   | 7.45 <sup>b</sup> , tt (1.4, 7.4) | 2',6'                               | 4'  |     |       |     |       | 128.4 <sup>c</sup> , d | 4'            |       |          |     |     |
| 4''                    |   | 7.55 <sup>c</sup> , tt (1.4, 7.4) | 3',5'                               |     |     |       |     |       | 132.7 <sup>d</sup> , d | 3',5'         |       |          |     |     |
| 29-O <sup>13</sup> C=O |   |                                   |                                     |     |     |       |     |       | 166.6, s               | 29a           | 29b   | 2'', 6'' |     |     |
| 1''                    |   |                                   |                                     |     |     |       |     |       | 130.7 <sup>a</sup> , s | 3'',5''       |       |          |     |     |
| 2'', 6''               |   | 8.04 <sup>a</sup> , dd (1.4, 7.4) | 3'',5''                             |     |     |       |     |       | 129.4 <sup>b</sup> , d | 2'',6''       | 4''   |          |     |     |
| 3'', 5''               |   | 7.43 <sup>b</sup> , tt (1.4, 7.4) | 2'',6''                             | 4'' |     |       |     |       | 128.3 <sup>c</sup> , d | 4''           |       |          |     |     |
| 4''                    |   | 7.54 <sup>c</sup> , tt (1.4, 7.4) | 3'',5''                             |     |     |       |     |       | 132.6 <sup>d</sup> , d | 2'',6''       |       |          |     |     |
| 7-OMe                  |   | 3.24, s                           |                                     |     |     | 5α    | 15α |       | 54.9, q                |               |       |          |     |     |

a—d Interchangeable.

**Figure S15.**  $^1\text{H}$ -NMR spectrum of compound **3**.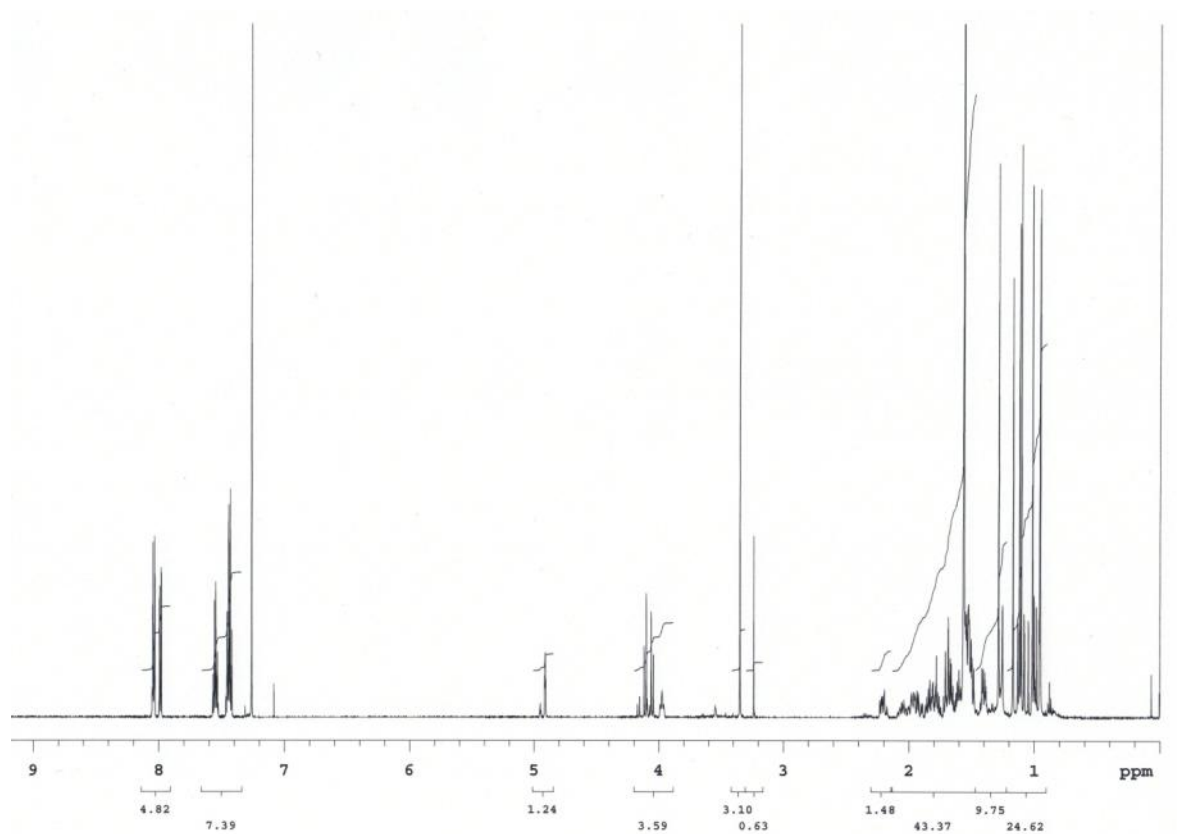

Figure S16.  $^{13}\text{C}$ -NMR spectrum of compound 3.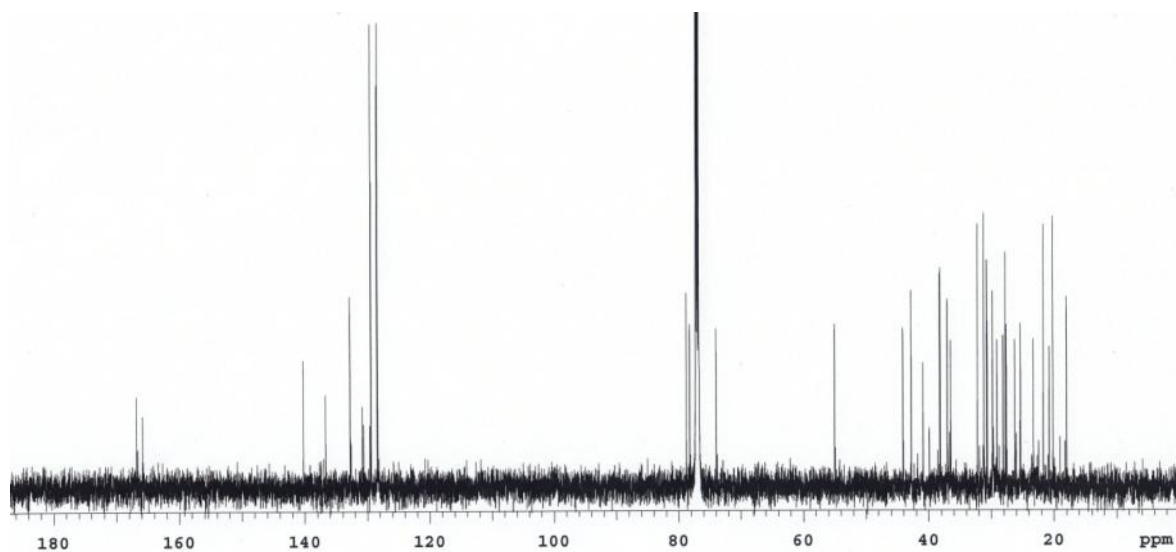

Figure S17. HSQC spectrum of compound 3.

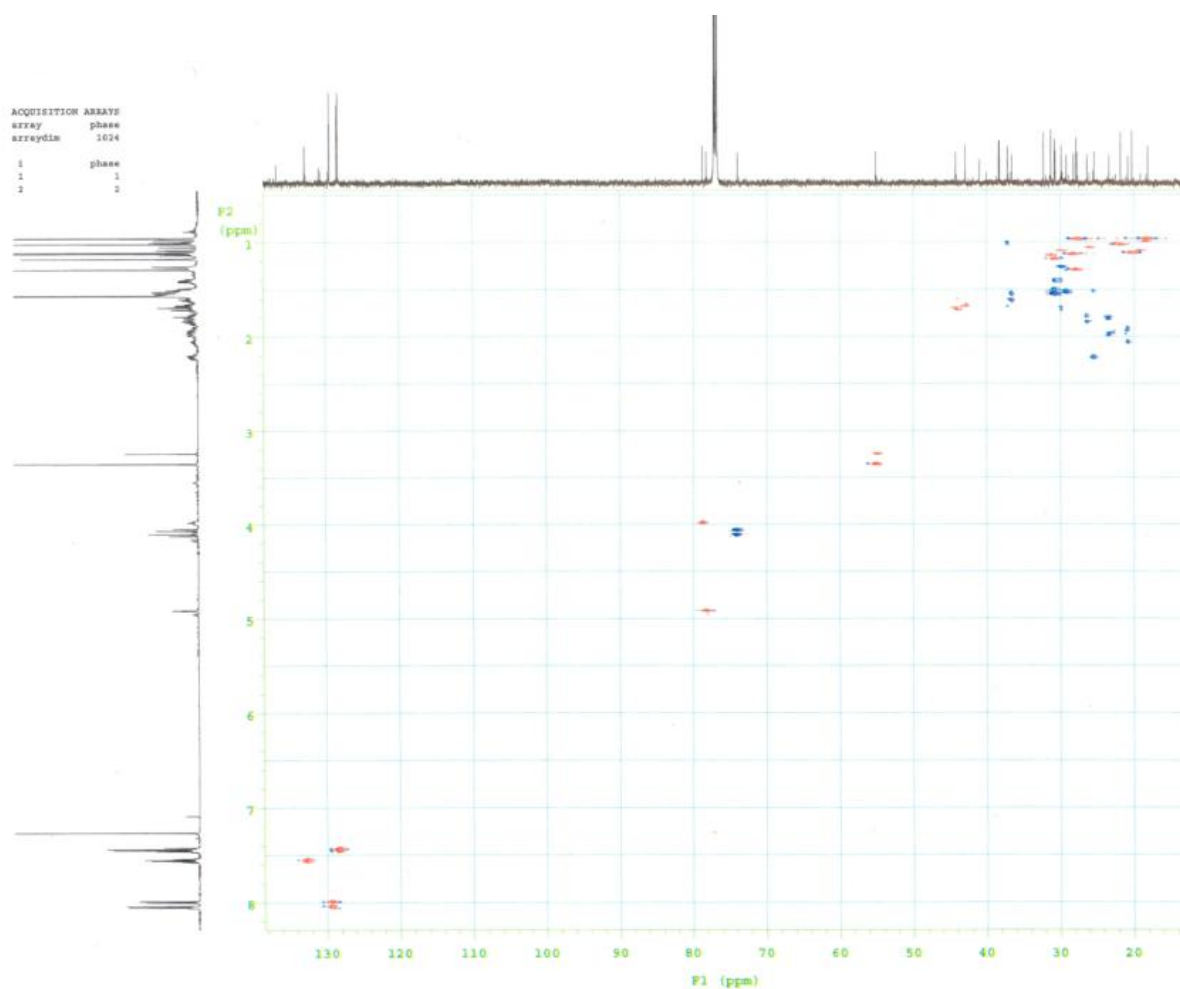

**Figure S18.** HMBC spectrum of compound 3.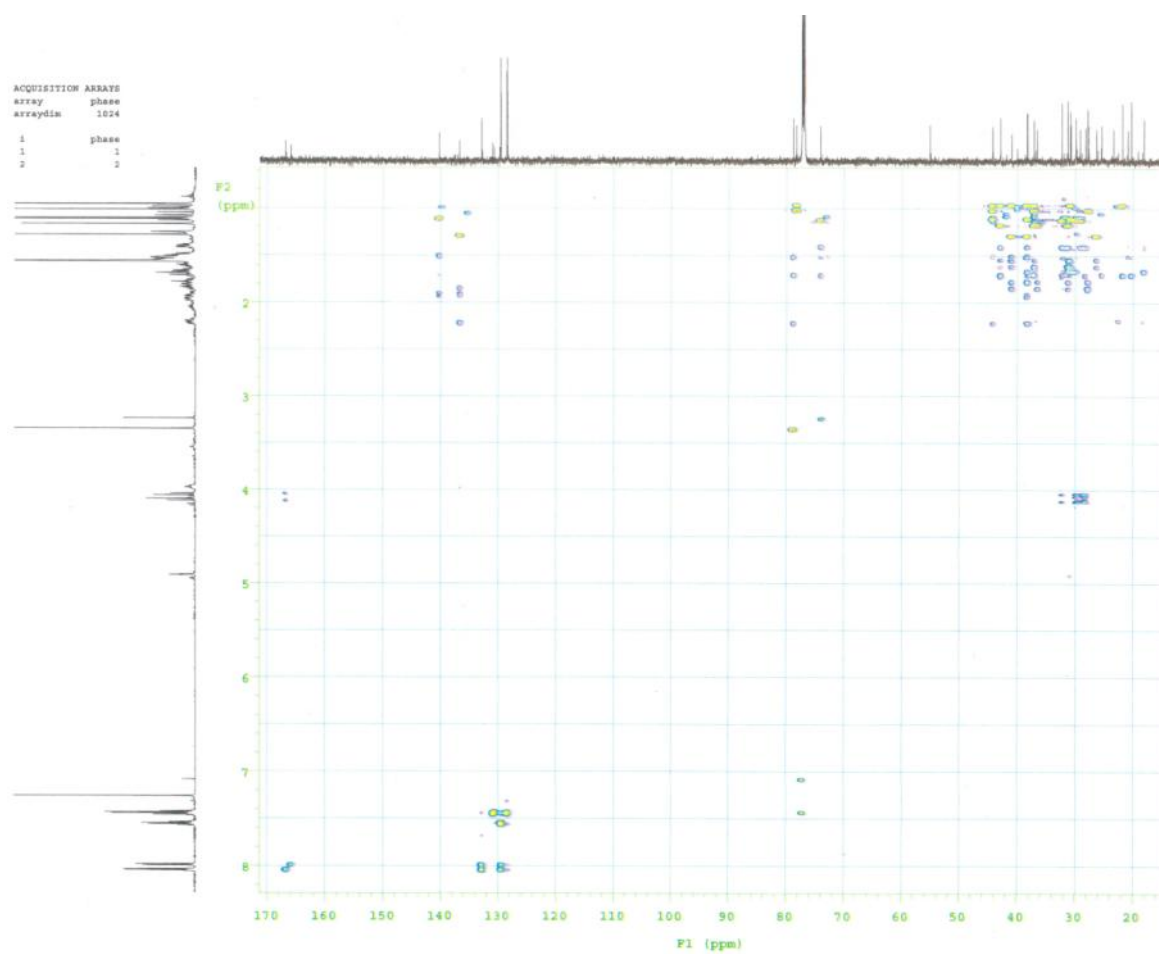

**Figure S19.**  $^1\text{H}$ - $^1\text{H}$  COSY spectrum of compound **3**.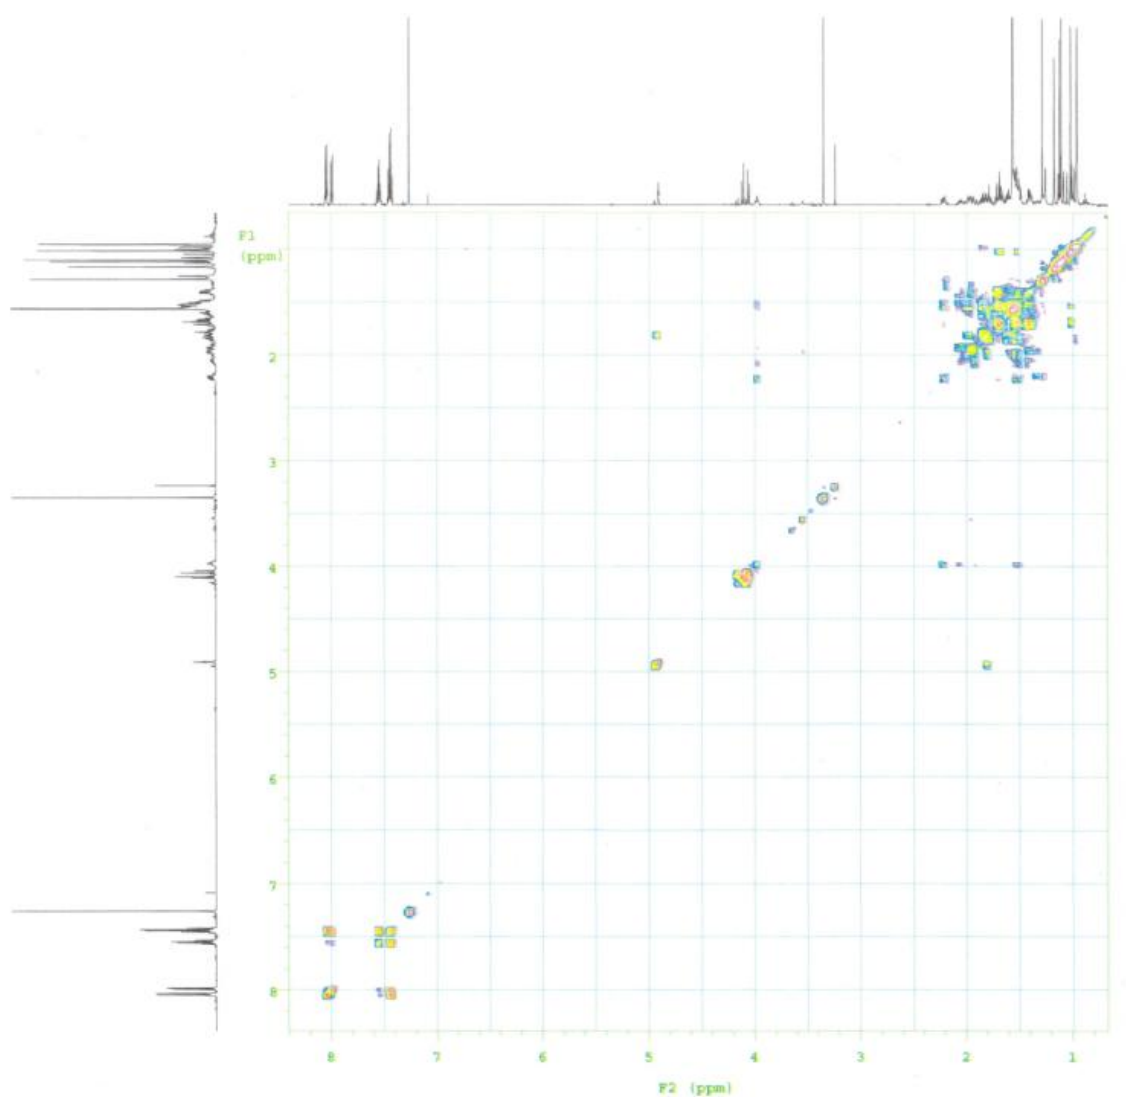

**Figure S20.** NOESY spectrum of compound **3**.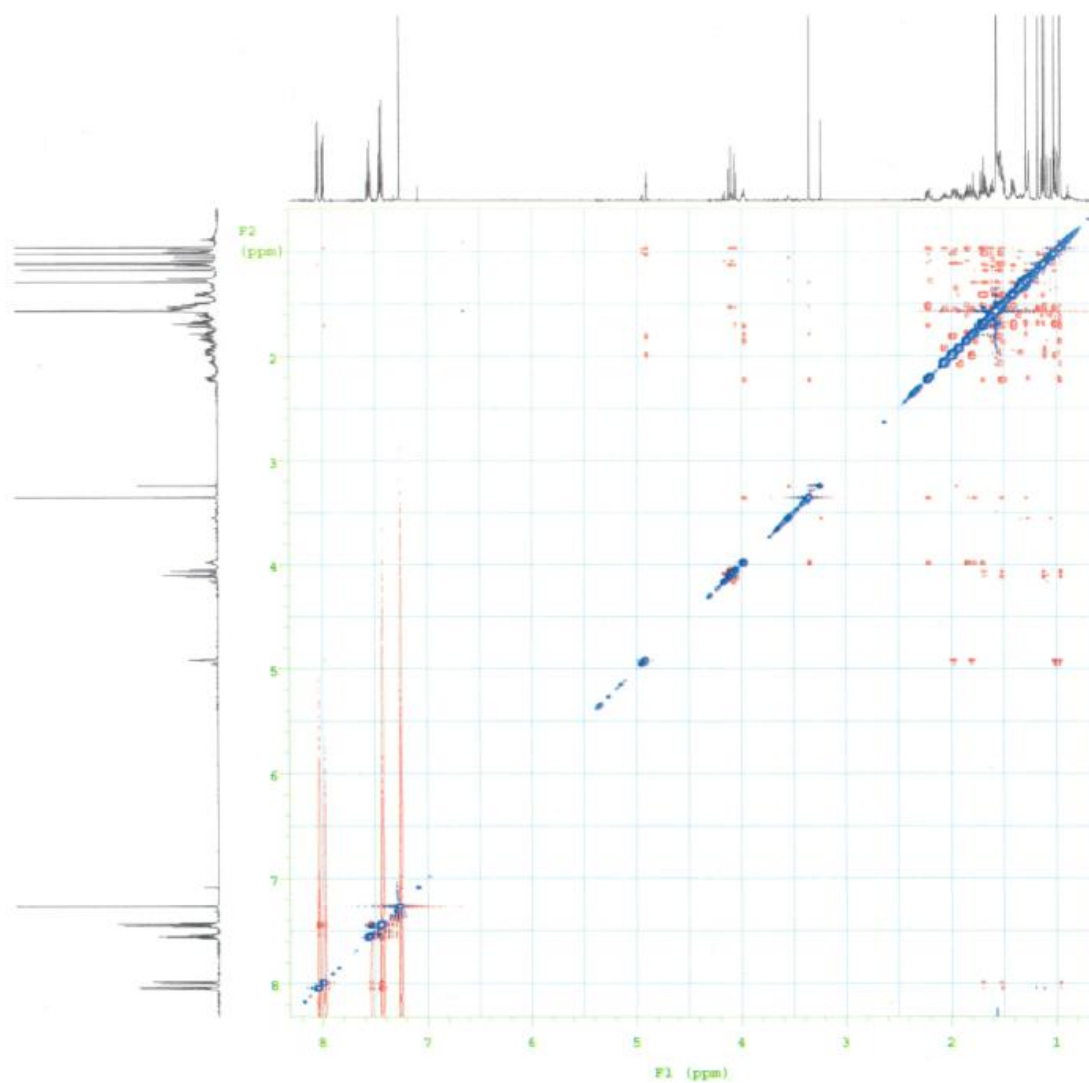

**Figure S21.** EI-MS of compound 3.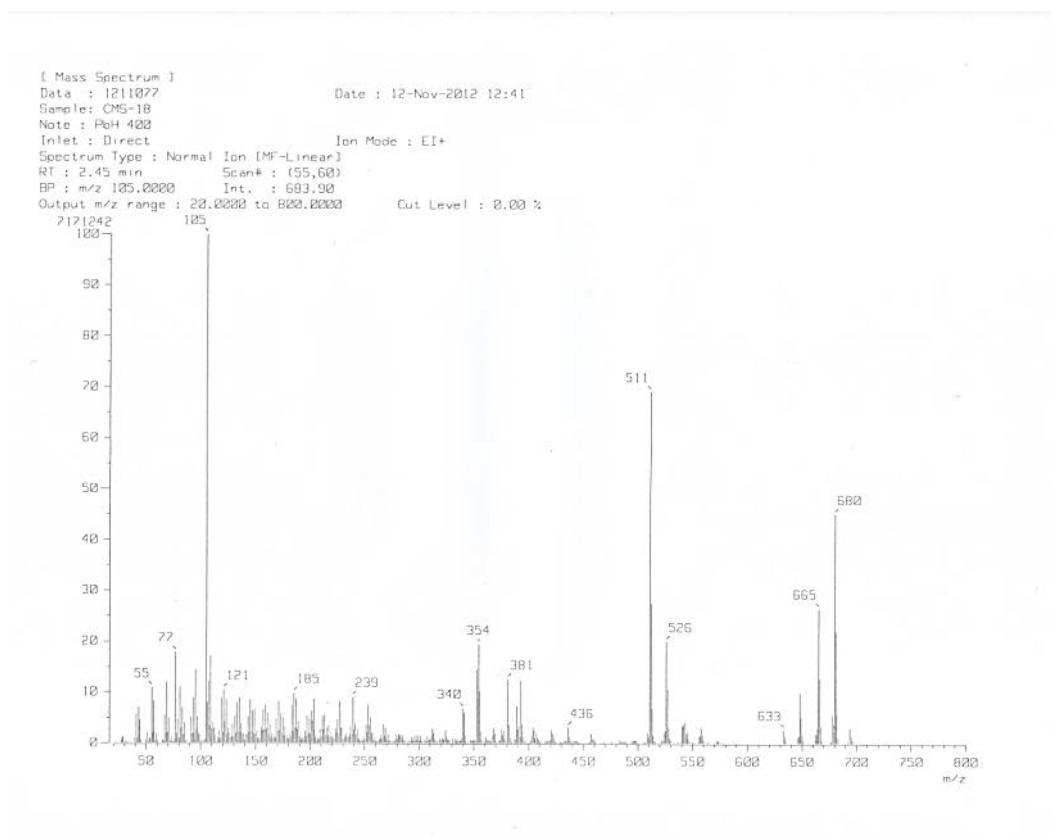

Table S3. <sup>1</sup>H (600 MHz) and <sup>13</sup>C (150 MHz), <sup>1</sup>H-<sup>1</sup>H COSY, NOESY, and HMBC NMR Spectroscopic Data of Compounds 3

| position |   | δ <sub>H</sub> (J in Hz) | <sup>1</sup> H- <sup>1</sup> H COSY |     |     |    | NOE |     | δ <sub>C</sub> , type | HMBC (H to C) |       |         |       |     |    |
|----------|---|--------------------------|-------------------------------------|-----|-----|----|-----|-----|-----------------------|---------------|-------|---------|-------|-----|----|
| 1        | α | 1.40, m                  | 1β                                  | 2α  | 2β  |    | 5α  |     | 30.6, t               | 25            |       |         |       |     |    |
|          | β | 1.52, m                  | 1α                                  | 2α  | 2β  |    |     |     |                       |               |       |         |       |     |    |
| 2        | α | 1.80, m                  | 1α                                  | 1β  | 2β  | 3β |     |     | 23.3, t               |               |       |         |       |     |    |
|          | β | 1.97, m                  | 1α                                  | 1β  | 2α  | 3β | 24  | 25  |                       |               |       |         |       |     |    |
| 3        |   | 4.91, t (3.0)            | 2α                                  | 2β  |     |    |     |     | 78.2, d               | 23            | 24    |         |       |     |    |
| 4        |   |                          |                                     |     |     |    |     |     | 37.0, s               | 5α            | 23    | 24      |       |     |    |
| 5        |   | 1.70, m                  | 6α                                  | 6β  |     |    | 1α  | 7α  | 44.1, d               | 6α            | 23    | 24      | 25    |     |    |
| 6        | α | 2.21, m                  | 5α                                  | 6β  | 7α  |    |     |     | 25.3, t               | 5α            |       |         |       |     |    |
|          | β | 1.51, m                  | 5α                                  | 6α  | 7α  |    |     |     |                       |               |       |         |       |     |    |
| 7        |   | 3.98, brt (7.6)          | 6α                                  | 6β  |     |    | 5α  | 15α | 78.8, d               | 5α            | 6α    | 6β      | 7-OMe |     |    |
| 8        |   |                          |                                     |     |     |    |     |     | 136.7, s              | 7α            | 11α   | 11β     | 15β   | 26  |    |
| 9        |   |                          |                                     |     |     |    |     |     | 140.3, s              | 1β            | 11β   | 25      |       |     |    |
| 10       |   |                          |                                     |     |     |    |     |     | 38.2, s               | 1α            | 1β    | 5       | 6α    | 25  |    |
| 11       | α | 2.03, m                  | 11β                                 | 12α | 12β |    | 27  |     | 20.8, t               | 12α           |       |         |       |     |    |
|          | β | 1.91, m                  | 11α                                 | 12α | 12β |    |     |     |                       |               |       |         |       |     |    |
| 12       | α | 1.51, m                  | 11α                                 | 11β | 12α |    |     |     | 30.7, t               | 18β           | 27    |         |       |     |    |
|          | β | 1.40, m                  | 11α                                 | 11β | 12β |    | 26  |     |                       |               |       |         |       |     |    |
| 13       |   |                          |                                     |     |     |    |     |     | 38.2, s               | 26            |       |         |       |     |    |
| 14       |   |                          |                                     |     |     |    |     |     | 40.9, s               | 15α           | 15β   | 16α     | 16β   | 26  | 27 |
| 15       | α | 1.78, m                  | 15β                                 | 16α | 16β |    | 7α  |     | 26.3, t               | 16α           | 16β   | 26      |       |     |    |
|          | β | 1.83, m                  | 15α                                 | 16α | 16β |    |     |     |                       |               |       |         |       |     |    |
| 16       | α | 1.61, m                  | 15α                                 | 15β | 16β |    |     |     | 36.5, t               | 15α           | 15β   | 28      |       |     |    |
|          | β | 1.53, m                  | 15α                                 | 15β | 16α |    | 18β |     |                       |               |       |         |       |     |    |
| 17       |   |                          |                                     |     |     |    |     |     | 31.2, s               | 15α           | 15β   | 19α     | 28    |     |    |
| 18       |   | 1.66, m                  | 19α                                 | 19β |     |    | 16β | 26  | 42.8, d               | 16β           | 19α   | 27      | 28    |     |    |
| 19       | α | 1.40, m                  | 18β                                 | 19α | 19β |    |     |     | 29.8, t               | 18β           | 29a   | 29b     | 30    |     |    |
|          | β | 1.50, m                  | 18β                                 | 19α | 19β |    | 28  |     |                       |               |       |         |       |     |    |
| 20       |   |                          |                                     |     |     |    |     |     | 32.2, s               | 19α           | 19β   | 22β     | 29a   | 29b | 30 |
| 21       |   | 1.52, m                  | 22α                                 | 22β |     |    |     |     | 29.1, t               | 29a           | 29b   | 30      |       |     |    |
| 22       | α | 1.68, m                  | 21                                  | 22β |     |    | 27  |     | 37.1, t               | 16α           | 16β   | 21      | 28    |     |    |
|          | β | 1.01, m                  | 21                                  | 22α |     |    |     |     |                       |               |       |         |       |     |    |
| 23       |   | 0.96, s                  |                                     |     |     |    | 6α  |     | 27.6, q               | 24            |       |         |       |     |    |
| 24       |   | 1.02, s                  |                                     |     |     |    | 6β  |     | 21.7, q               | 5α            | 23    |         |       |     |    |
| 25       |   | 1.10, s                  |                                     |     |     |    | 2β  |     | 20.2, q               | 5α            |       |         |       |     |    |
| 26       |   | 1.29, s                  |                                     |     |     |    | 12β | 18β | 27.8, q               | 15α           | 15β   |         |       |     |    |
| 27       |   | 0.95, s                  |                                     |     |     |    | 11α | 22α | 18.0, q               | 12β           | 18β   |         |       |     |    |
| 28       |   | 1.17, s                  |                                     |     |     |    | 19β | 26  | 30.7, q               |               |       |         |       |     |    |
| 29       | a | 4.11, d (10.6)           |                                     |     |     |    | 27  |     | 74.0, t               | 19α           | 30    |         |       |     |    |
|          | b | 4.05, d (10.6)           |                                     |     |     |    | 27  |     |                       |               |       |         |       |     |    |
| 30       |   | 1.12, s                  |                                     |     |     |    |     |     | 28.1, q               | 19α           | 29a   | 29b     |       |     |    |
| 3-OCO    |   |                          |                                     |     |     |    |     |     | 165.9, s              | 3β            | 2',6' |         |       |     |    |
| 1'       |   |                          |                                     |     |     |    |     |     | 130.6, s              |               |       |         |       |     |    |
| 2'', 6'' |   | 7.99, dd (1.4, 7.4)      | 3',5'                               |     |     |    |     |     | 129.4, d              | 2',6'         | 4'    |         |       |     |    |
| 3'', 5'' |   | 7.45, tt (1.4, 7.4)      | 2',6'                               | 4'  |     |    |     |     | 128.5, d              | 3',5'         |       |         |       |     |    |
| 4''      |   | 7.56, tt (1.4, 7.4)      | 3',5'                               |     |     |    |     |     | 132.8, d              | 2',6'         |       |         |       |     |    |
| 29-OCO   |   |                          |                                     |     |     |    |     |     | 166.8, s              | 29a           | 29b   | 2'',6'' |       |     |    |
| 1''      |   |                          |                                     |     |     |    |     |     | 130.9, s              |               |       |         |       |     |    |
| 2'', 6'' |   | 8.04, dd (1.7, 7.3)      | 3'',5''                             |     |     |    |     |     | 129.5, d              | 2'',6''       | 4''   |         |       |     |    |
| 3'', 5'' |   | 7.43, tt (1.7, 7.3)      | 2'',6''                             | 4'' |     |    |     |     | 128.4, d              | 3'',5''       |       |         |       |     |    |
| 4''      |   | 7.55, tt (1.7, 7.3)      | 3'',5''                             |     |     |    |     |     | 132.8, d              | 2'',6''       |       |         |       |     |    |
| 7-OMe    |   | 3.35, s                  |                                     |     |     |    | 26  |     | 55.0, q               |               |       |         |       |     |    |
